# Supplementary material
Source: PubMed Central journal article supplement (PMC4331239)
Supplement: NIHMS640430-supplement-2.pdf [file NIHMS640430-supplement-2.pdf]

# Supplementary Table S1

| SiBPs        | Oligonucleotides (5'→3')                                            |
|--------------|---------------------------------------------------------------------|
| A1-sense     | ctagcAGCGGCAGCAAAGGCAGCAAACGCCGCATTCTGa                             |
| A1-antisense | ctagtCAGAATGCGGCGTTTGCTGCCTTTGCTGCCGCTg                             |
| A3-sense     | ctagcATGAGCCCGCATCCGCATCCGCGCCATCATCATAcCa                          |
| A3-antisense | ctagtGGTATGATGATGGCGCGGATGCGGATGCGGGCTCATg                          |
| R5-sense     | ctagcAGCAGCAAAAAAAGCGGCAGCTATAGCGGCAGCAAAGGCAGC<br>AAACGCCGCATTCTGa |
| R5-antisense | ctagtCAGAATGCGGCGTTTGCTGCCTTTGCTGCCGCTATAGCTGCCGC<br>TTTTTTGCTGCTg  |

---
