# Supplementary material
Source: PubMed Central journal article supplement (PMC4331239)
Supplement: NIHMS640430-supplement-3.pdf [file NIHMS640430-supplement-3.pdf]

# Supplementary Table S2

|         | <b><math>\beta</math>-sheet</b> | <b><math>\beta</math>-turn</b> | <b><math>\alpha</math>-helix</b> | <b>Random coils</b> |
|---------|---------------------------------|--------------------------------|----------------------------------|---------------------|
| 6mer    | $34.4 \pm 1.5^a$                | $15.8 \pm 2.3^a$               | $14.6 \pm 4.6^a$                 | $35.3 \pm 2.6^a$    |
|         | $35.6 \pm 1.5^b$                | $17.1 \pm 0.8^b$               | $11.5 \pm 2.2^b$                 | $35.9 \pm 0.2^b$    |
|         | $41.2 \pm 0.2^c$                | $17.3 \pm 1^c$                 | $8.9 \pm 2.2^c$                  | $32.6 \pm 1.3^c$    |
| 6mer-A1 | $32.0 \pm 3.4^a$                | $17.9 \pm 0.3^a$               | $8.6 \pm 2.9^a$                  | $41.5 \pm 0.7^a$    |
|         | $33.8 \pm 2.1^b$                | $18.2 \pm 1.0^b$               | $7.5 \pm 2.9^b$                  | $40.5 \pm 0.2^b$    |
|         | $38.8 \pm 1.5^c$                | $16.2 \pm 2.1^c$               | $10.5 \pm 4.1^c$                 | $34.5 \pm 3.6^c$    |
| 6mer-A3 | $34.2 \pm 0.7^a$                | $18.2 \pm 0.6^a$               | $9.3 \pm 2.3^a$                  | $38.2 \pm 1.2^a$    |
|         | $36.9 \pm 1.0^b$                | $20.0 \pm 1.0^b$               | $4.7 \pm 2.1^b$                  | $38.3 \pm 0.2^b$    |
|         | $41.3 \pm 1.2^c$                | $16.9 \pm 2.4^c$               | $10.0 \pm 5.9^c$                 | $31.9 \pm 2.7^c$    |
| 6mer-R5 | $33.5 \pm 1.2^a$                | $17.8 \pm 0.6^a$               | $6.6 \pm 3^a$                    | $42.1 \pm 1.4^a$    |
|         | $33.9 \pm 1.3^b$                | $19.5 \pm 1.2^b$               | $4.5 \pm 2.3^b$                  | $42.2 \pm 1.8^b$    |
|         | $39.8 \pm 0.2^c$                | $18.6 \pm 0.8^c$               | $5.4 \pm 2.1^c$                  | $36.3 \pm 1.2^c$    |

a - water annealing at 50°C

b - water annealing at 70°C

c - 70% methanol treated
