# Supplementary material
Source: PubMed Central journal article supplement (PMC4331239)

# Supplementary Figure S1

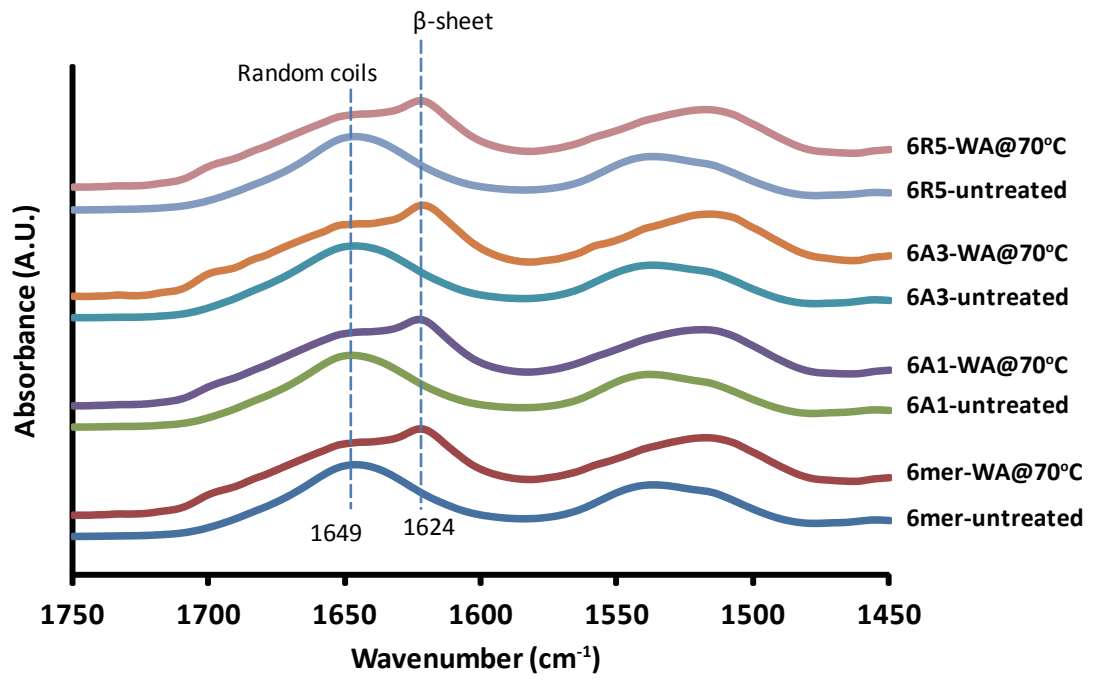

Supplement: NIHMS640430-supplement-1.pdf [file NIHMS640430-supplement-1.pdf]
